# Supplementary material for: Brief communication: Long-term absence of Langerhans cells alters the gene expression profile of keratinocytes and dendritic epidermal T cells
Source: PubMed Central journal article supplement (PMC6953782; doi:10.1371/journal.pone.0223397), 2020-01-10

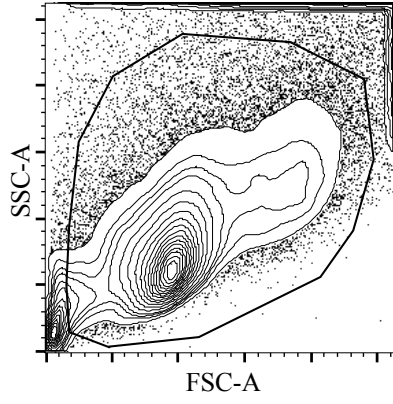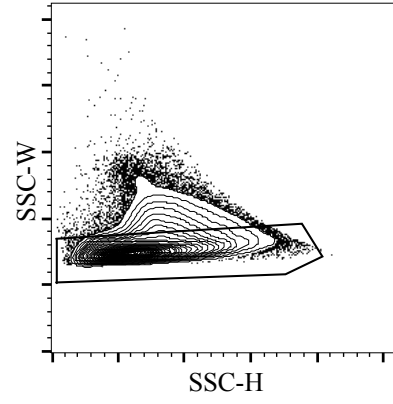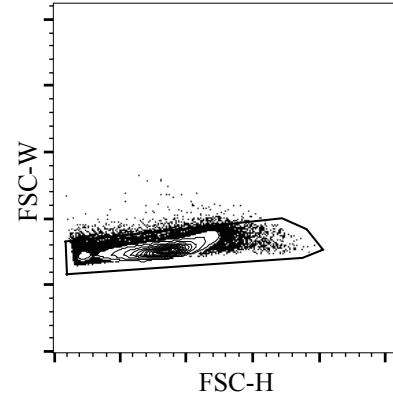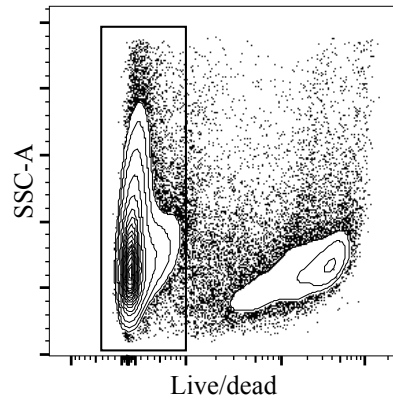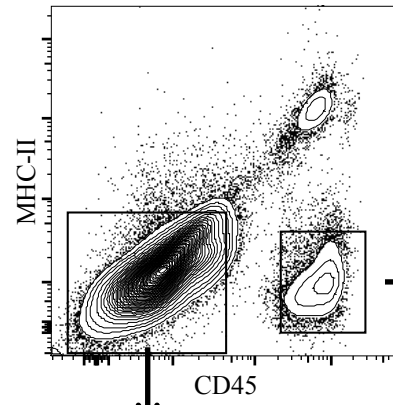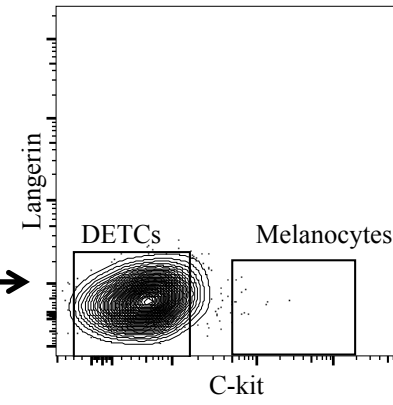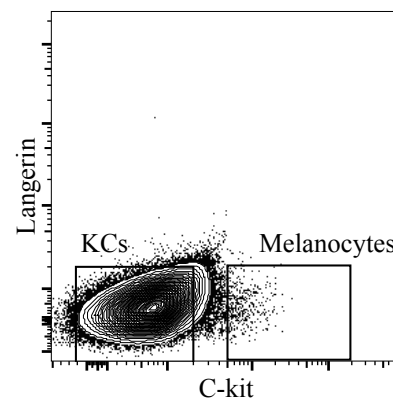

Supplement: pone.0223397.s001.pdf [file pone.0223397.s001.pdf]
